# Supplementary material for: The type of suture material affects transverse aortic constriction-induced heart failure development in mice: a repeated measures correlation analysis
Source: Front Cardiovasc Med. 2023 Sep 19;10:1242763. doi: 10.3389/fcvm.2023.1242763 (PMC10546326; doi:10.3389/fcvm.2023.1242763)
Supplement: Supplementary file 3 [file Table1.xlsx]

## Sheet: Sheet 1
parameter
